# Supplementary material
Source: publisher site journal article supplement (https://www.dovepress.com/article/261700)
Supplement: Supplementary file 1 [file get_supplementary_file.php]

**Supplementary figure legends**

**Supplementary Figure 1. Effect of paclitaxel on HCC cell viability.** (A and B) Cell viability was assessed by CCK-8 assay in Huh-7 and Hep3B cells treated with different concentrations of paclitaxel (0 nM, 2 nM, 4 nM, 6 nM, 8 nM, and 10 nM). **P*<0.05.

**
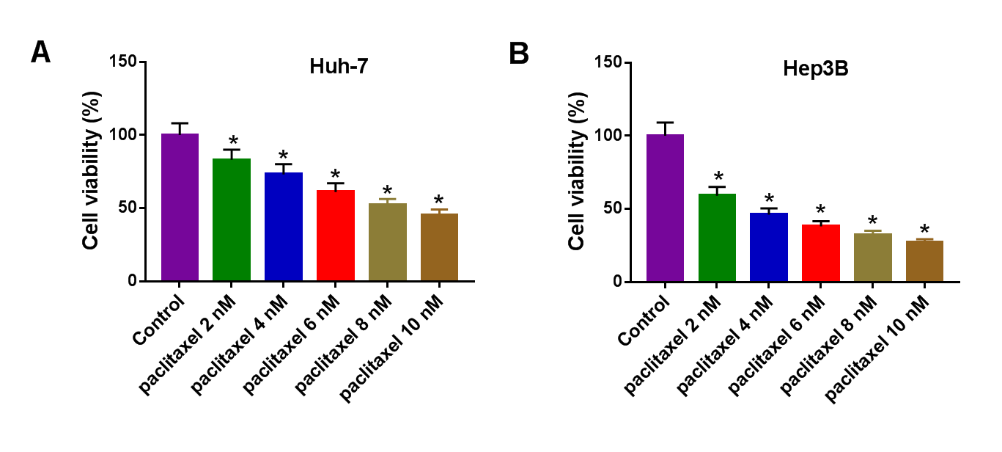
**

**Supplementary Figure 2. The original figure of clone formation of Huh-7 cells without paclitaxel.**

**
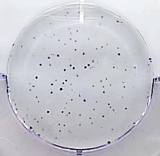
**

**Supplementary Figure 3. The original figure of clone formation of Huh-7 cells treated with 2 nM paclitaxel.**

**
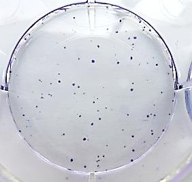
**

**Supplementary Figure 4. The original figure of clone formation of Huh-7 cells treated with 10 nM paclitaxel.**

**
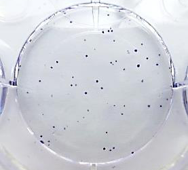
**

**Supplementary Figure 5. The original figure of clone formation of Huh-7 cells treated with 20 nM paclitaxel.**

**
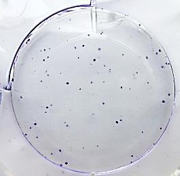
**

**Supplementary Figure 6. The original figure of clone formation of Hep3B cells without paclitaxel.**

**
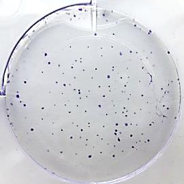
**

**Supplementary Figure 7. The original figure of clone formation of Hep3B cells treated with 2 nM paclitaxel.**

**
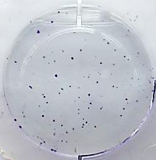
**

**Supplementary Figure 8. The original figure of clone formation of Hep3B cells treated with 10 nM paclitaxel.**

**
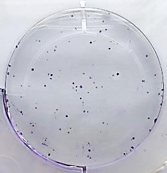
**

**Supplementary Figure 9. The original figure of clone formation of Hep3B cells treated with 20 nM paclitaxel.**

**
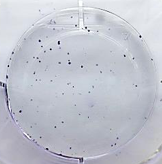
**
